# Supplementary material
Source: PubMed Central journal article supplement (PMC4252799)
Supplement: NIHMS629334-supplement.pdf [file NIHMS629334-supplement.pdf]

## Supplemental Information

### **Structural Basis of the pH-Dependent Assembly of a Botulinum Neurotoxin Complex**

Tsutomu Matsui, Shenyan Gu, Kwok-ho Lam, Lester G. Carter, Andreas Rummel, Irimpan I. Mathews and Rongsheng Jin

#### **Inventory of the Supplemental Information**

Fig. S1. SAXS profiles of BoNT/Ai and NTNHA-A at various examined concentrations.

Fig. S2. Reproducibility of rigid body refinements.

Fig. S3. The effect of the reconstructed loops on NTNHA-A on its SAXS profile.

Fig. S4. Sensitivity of different orientations of the nH<sub>C</sub> domain on the SAXS profile of NTNHA-A.

Fig. S5. Examples of FPLC-SAXS profiles of the M-PTC at different fractions.

Table S1: SAXS data collection and analysis.

Table S2: Summary of rigid body refinement by program CORAL.

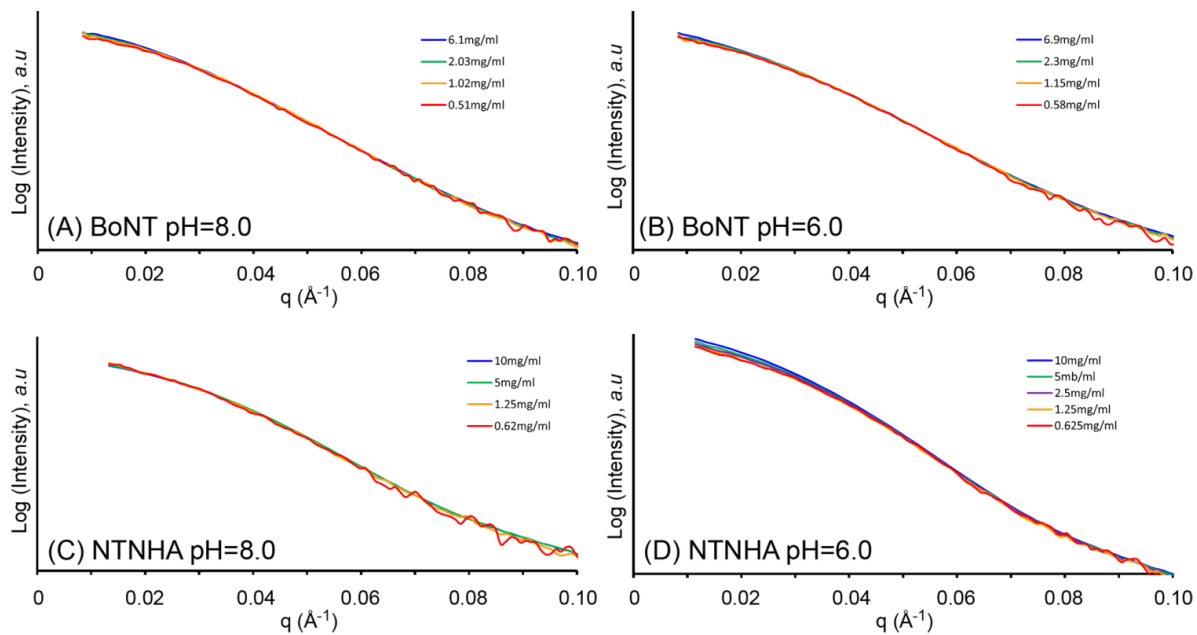

Fig. S1. SAXS profiles of BoNT/Ai and NTNHA-A at various examined concentrations.

A

pH=8.0

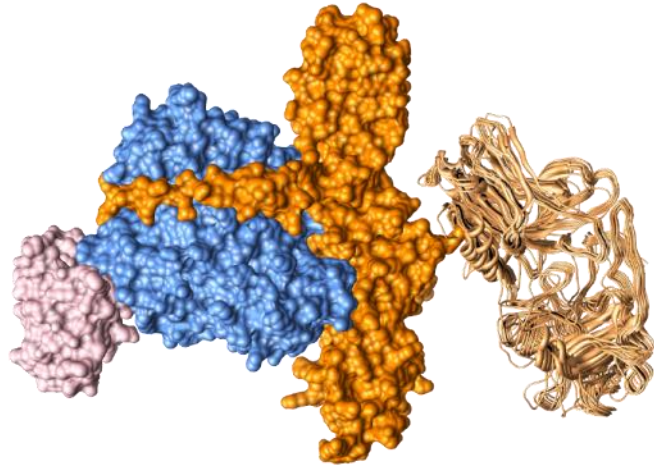

pH=6.0

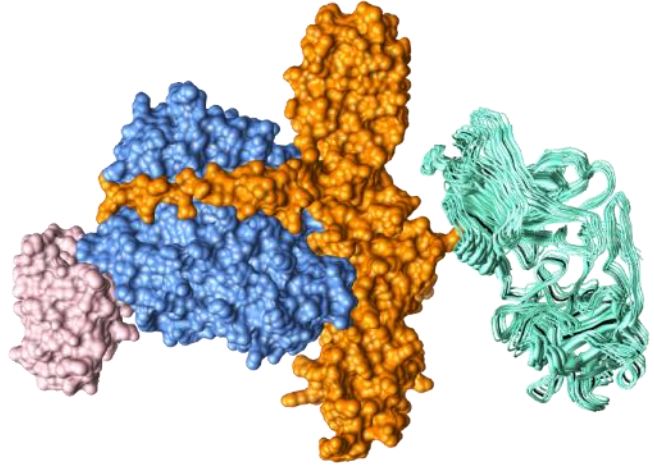

pH=8.0 vs 6.0

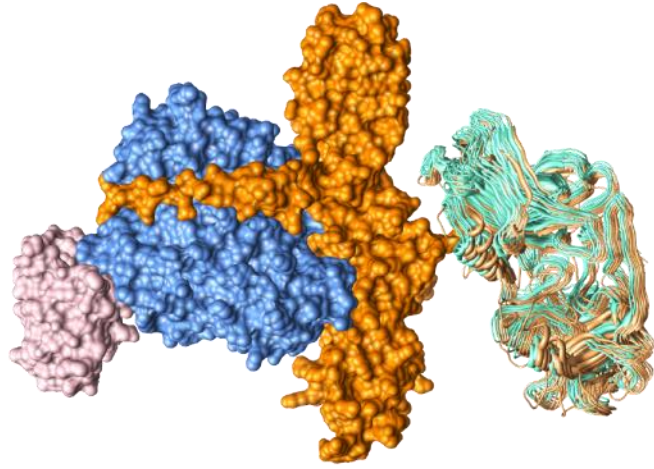

(side view)

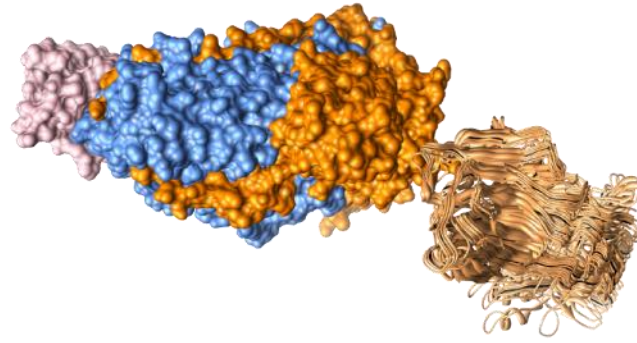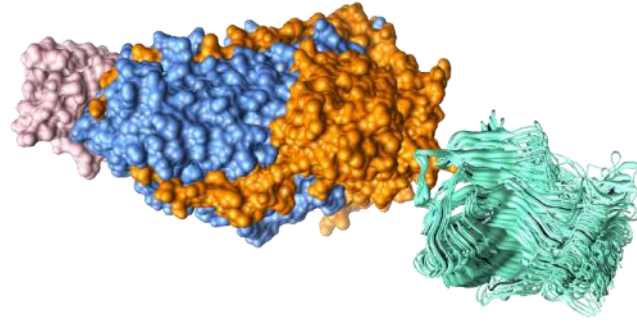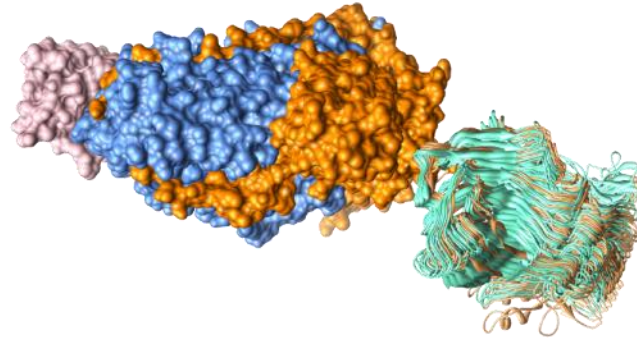

**B**

pH=6.0

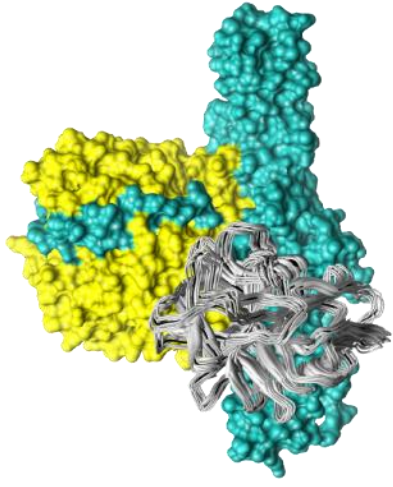

pH=8.0

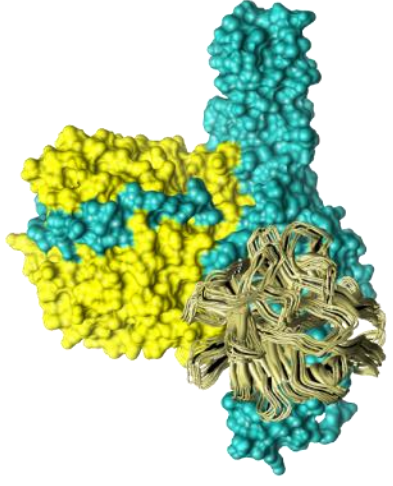

pH=8.0 vs 6.0

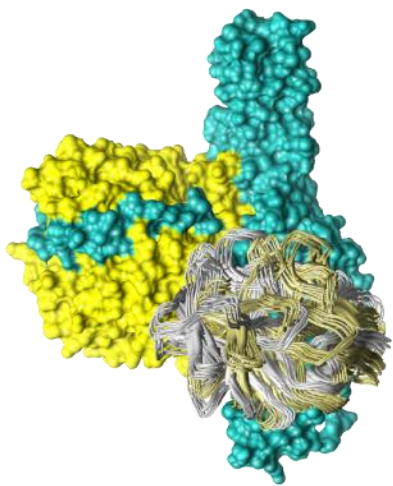

(side view)

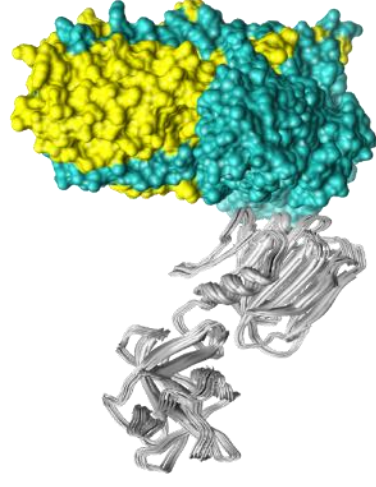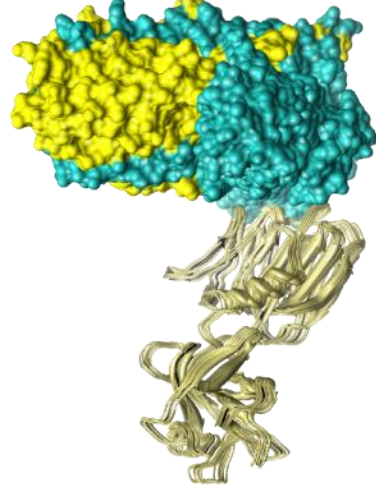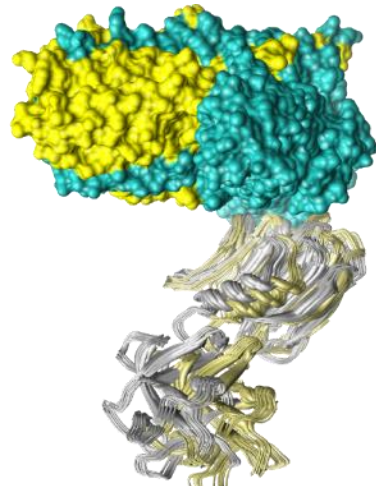

Fig. S2. Reproducibility of rigid body refinements. (A) BoNT/Ai. The results from 10 independent runs were superimposed onto VHH and BoNT/Ai LC-H<sub>N</sub> domains shown as molecular surface representations. H<sub>C</sub> domains from each refinement were shown as ribbon representation. The average position of 10 runs was colored in black. Significant difference was not observed between pH = 6.0 and 8.0 (third column). The lack fragments and a flexible linker were not shown. (B) NTNHA-A. The 10 independent runs were superimposed onto NTNHA-A nLC-nH<sub>N</sub> domains in the same way. Contrast to BoNT/Ai, the positioning of nH<sub>C</sub> domain was well converged at each pH value and significant pH-dependence was observed. See Fig. S4 for more analyses on sensitivity of nH<sub>C</sub> position to the scattering profile.

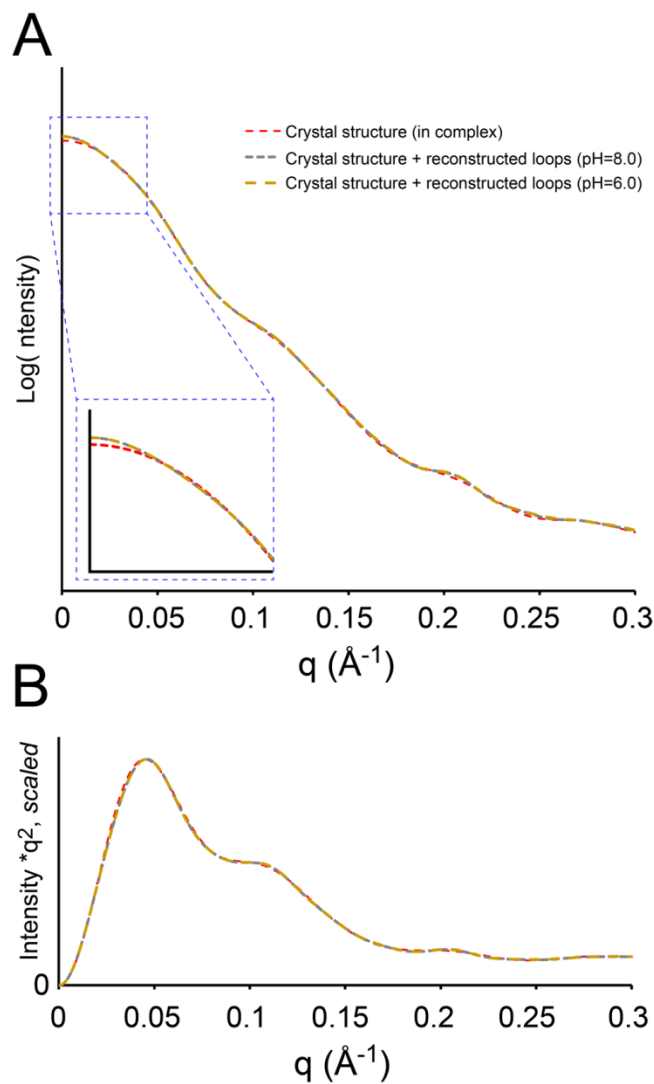

Fig. S3. The effect of reconstructed loops of NTNHA-A on its SAXS profile. (A) Both the long (Gly114–Ala148) and short (Try442–Asn450) loops reconstructed by SAXS-based rigid body refinements were replanted to the crystal structure of NTNHA-A, and the theoretical curve was then computed. There is no significant difference at the middle angle whereas subtle differences are exist at low and high angle parts. (B) Kratky plot derived from panel A. No significant difference is observed.

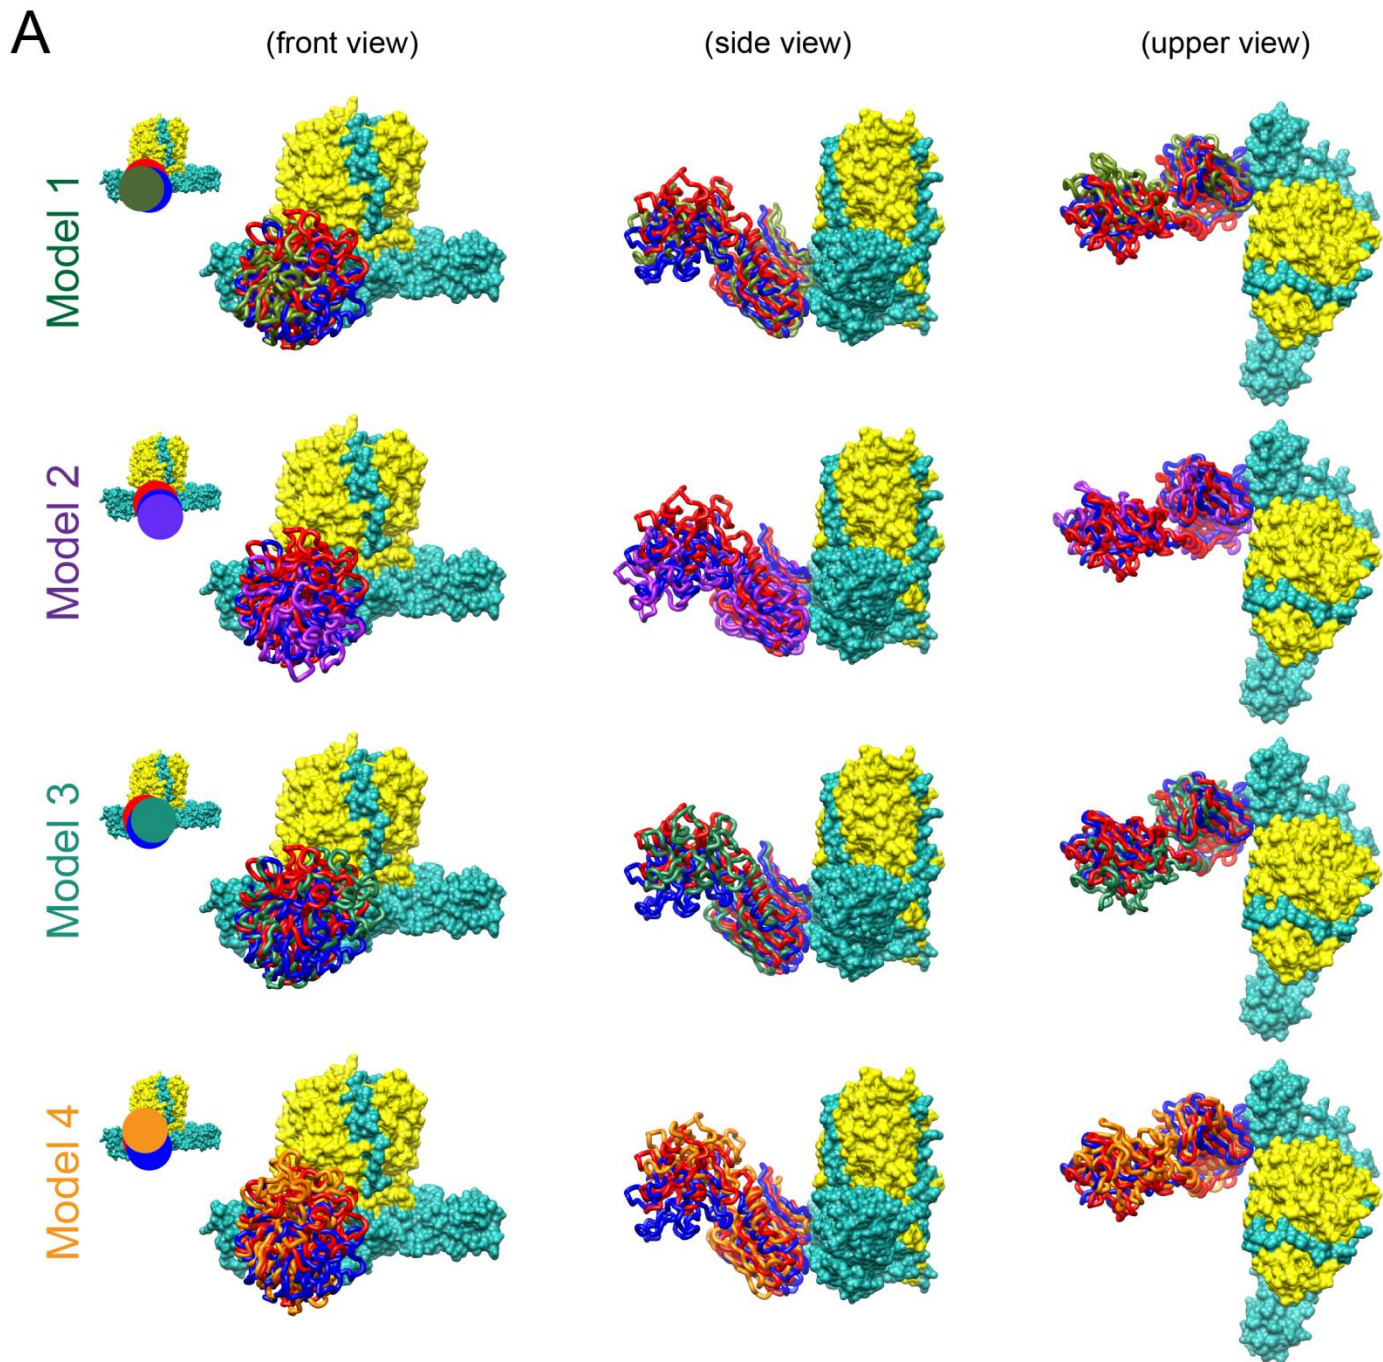

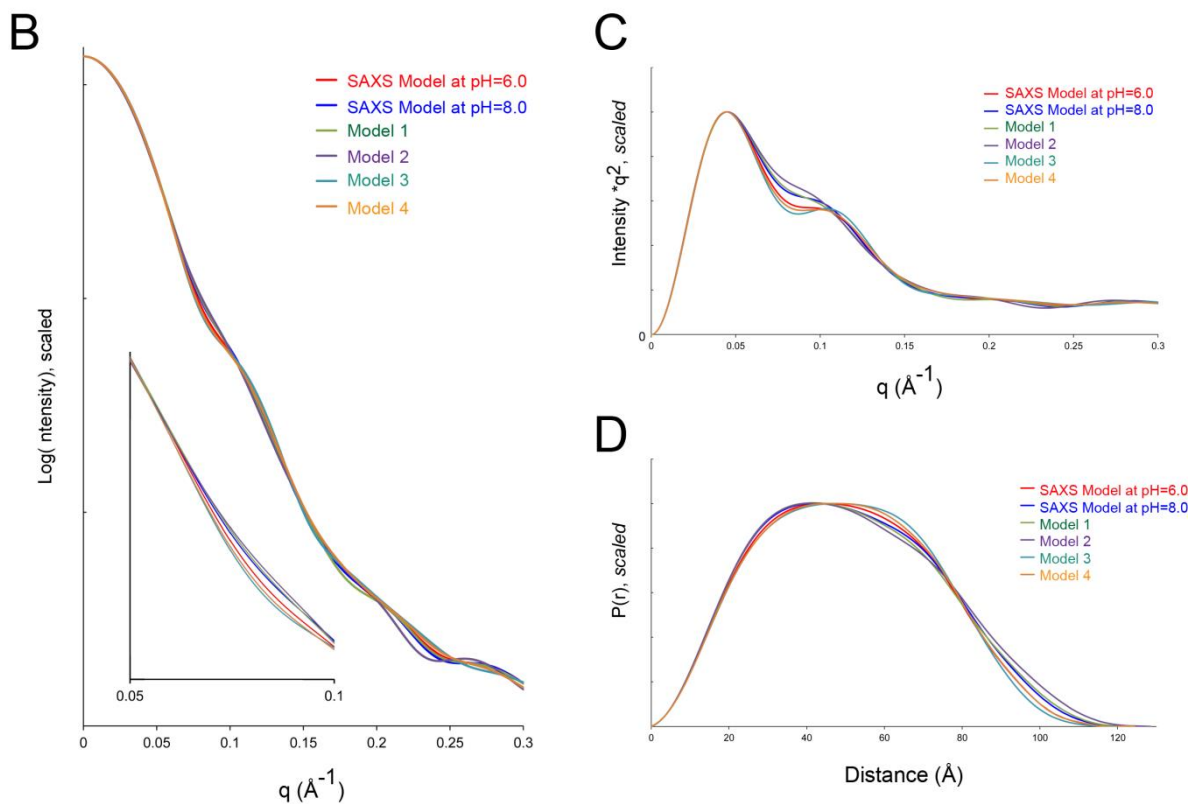

Fig. S4. Sensitivity of the nH<sub>C</sub> domain positioning on the SAXS profile of NTNHA-A. (A) Four models with slightly different hinge motion of the nH<sub>C</sub> domain were randomly generated based on the resultant models at pH = 6.0 (red) and 8.0 (blue). The disorder region simulated in Fig. S3 is not included. (B) Theoretical SAXS profiles of the four models. The profiles were scaled at  $I(0)$ . Inset is a magnified view from  $q=0.05$  to  $0.10$   $\text{\AA}^{-1}$ . (C) Theoretical Kratky plots, which were scaled at the peak height. The scattering profile at middle  $q$  angles is sensitive to a slight torsional motion of the nH<sub>C</sub> domain and that is emphasized by Kratky plot. (D) Pair distance distributions  $P(r)$ , which were scaled at the peak height. Such a slight motion can dramatically alter  $P(r)$  due to non-globular, elongated and asymmetric molecular shape of the nLC–nH<sub>N</sub> and nH<sub>C</sub> domains.



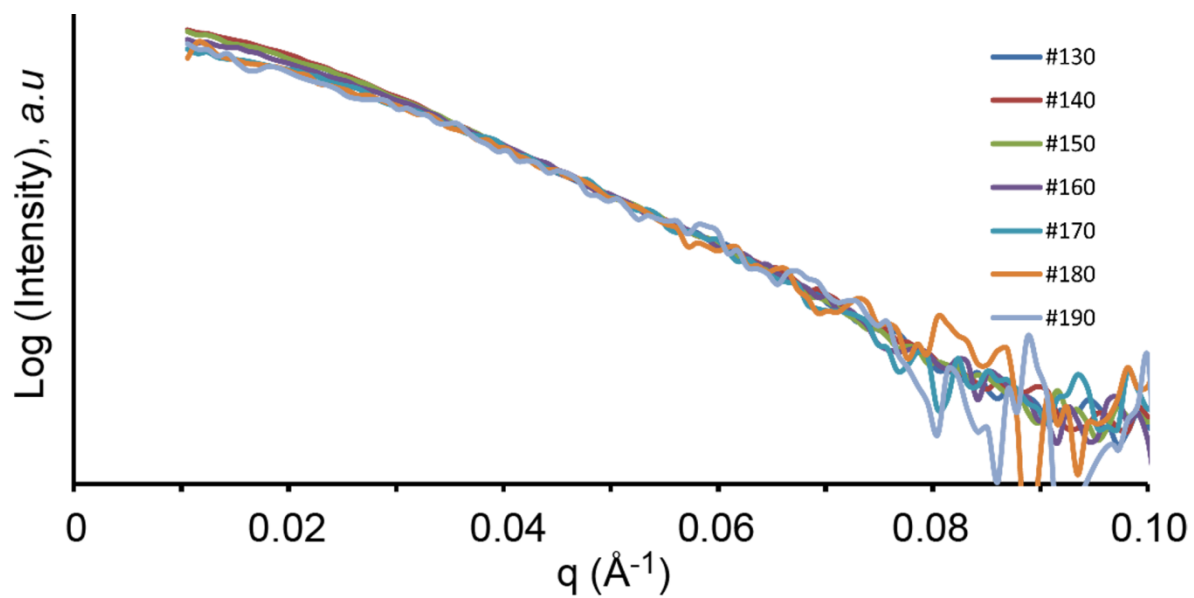

Fig. S5. Examples of FPLC-SAXS profiles of the M-PTC at different fractions. Concentration-dependent intermolecular interactions were observed.

Table S1: SAXS data collection and analysis.

|                                                                            |                                   |             |             |             |           |
|----------------------------------------------------------------------------|-----------------------------------|-------------|-------------|-------------|-----------|
| Experimental Setup                                                         |                                   |             |             |             |           |
| Beamline                                                                   | SSRL BL4-2                        |             |             |             |           |
| Type of monochromter                                                       | Si(111)                           |             |             |             |           |
| Defining Slits size (mm)                                                   | 0.3(H) x 0.3 (V)                  |             |             |             |           |
| Beam energy (keV)                                                          | 11                                |             |             |             |           |
| Beam current                                                               | 300 mA with 5 min top-off mode    |             |             |             |           |
| Sample-Detector Distance (m)                                               | 1.7                               |             |             |             |           |
| Detector                                                                   | Rayonix MX225-HE                  |             |             |             |           |
| Pixel binning                                                              | 8x8                               |             |             |             |           |
| Pixel size (mm)                                                            | 292                               |             |             |             |           |
| Exposure time (sec)                                                        | 1                                 |             |             |             |           |
| Type of sample Cell                                                        | Quartz capillary (Diameter=1.5mm) |             |             |             |           |
| Sample volumn per data set (ml)                                            | 30                                |             |             |             |           |
| Rate of oscillation (ml/sec)                                               | 2                                 |             |             |             |           |
| Measurement repeats                                                        | 15                                |             |             |             |           |
| Temperature (K)                                                            | 283                               |             |             |             |           |
| Data analysis                                                              | BoNT/Ai                           | BoNT/Ai     | NTNHA-A     | NTNHA-A     | M-PTC     |
| pH                                                                         | pH=8                              | pH=6        | pH=8        | pH=6        | pH=6      |
| Type of SAXS experiment                                                    | Equilibrium                       | Equilibrium | Equilibrium | Equilibrium | FPLC      |
| Max protein concentration (mg/ml)                                          | 6.1                               | 6.9         | 10          | 10          | N.A.      |
| Min protein concentration (mg/ml)                                          | 0.51                              | 0.58        | 0.63        | 0.63        | N.A.      |
| Rg (qRg<1.3)                                                               | 43.3                              | 43.7        | 39.7        | 39.5        | 51.2      |
| SD                                                                         | 0.24                              | 0.22        | 0.06        | 0.26        | 0.55      |
| Rg (real)                                                                  | 44.7                              | 44.9        | 39.9        | 40.3        | 52.2      |
| SD                                                                         | 0.10                              | 0.06        | 0.02        | 0.06        | 0.14      |
| Rg (reciprocal)                                                            | 44.6                              | 44.8        | 39.9        | 40.3        | 52.1      |
| Dmax                                                                       | 150                               | 153         | 127.5       | 131         | 167.5     |
| Molecular weight estimation                                                |                                   |             |             |             |           |
| SAXS MoW, q<0.3 (kDa)                                                      | 158.8                             | 152.7       | 139.5       | 143.3       | 343.6     |
| based on water scattering (kDa)                                            | 122.7                             | 118.7       | 101.2       | 105.1       | N.A.      |
| Modeling                                                                   | BoNT/Ai                           | BoNT/Ai     | NTNHA-A     | NTNHA-A     | M-PTC     |
| pH                                                                         | pH=8                              | pH=6        | pH=8        | pH=6        | pH=6      |
| Methods                                                                    | Rigid body                        | Rigid body  | Rigid body  | Rigid body  | ab initio |
| Program                                                                    | CORAL                             | CORAL       | CORAL       | CORAL       | GASBOR    |
| qmin                                                                       | 0.0177                            | 0.0177      | 0.0152      | 0.0152      | 0.0171    |
| qmax                                                                       | 0.3                               | 0.3         | 0.3         | 0.3         | 0.3       |
| Chi square (SAXS model)                                                    | 2.21                              | 2.49        | 2.11        | 2.31        | N/A       |
| Chi square (Crystal Structure)                                             | 3.84                              | 4.37        | 10.98       | 15.04       | 3.19*     |
| BIOISIS ID ( <a href="http://www.bioisis.net">http://www.bioisis.net</a> ) | BONT8P                            | BONT6P      | NTNH8P      | NTNH6P      | MPTC6P    |
| Crystal Structure*                                                         | BoNT/A                            | BoNT/Ai     |             | NTNHA-A     | M-PTC     |
| pH                                                                         | 7                                 | 6           |             | 6           | 6         |
| PDB ID                                                                     | 3BTA                              | 3V0A        |             | 3V0A        | 3V0A      |
| Conformation                                                               | Free form                         | In complex  |             | In Complex  | Complex   |
| Rg**                                                                       | 43.4                              | 41.1        |             | 38.4        | 46.4      |
| Dmax**                                                                     | 156.2                             | 144.1       |             | 125.4       | 179       |
| Full-length (aa)                                                           | 1413**                            | 1413**      |             | 1193        | 2606**    |
| Disorder residues (aa)                                                     | 18                                | 18          |             | 44          | 62        |
| Disorder residues (%)                                                      | 1.27                              | 1.27        |             | 3.69        | 2.38      |
| Molecular Weight                                                           | 159.2                             | 159.2       |             | 131.8       | 278.1     |

\*VHH with BoNT/Ai is taken into account. \*\*All side chains are taken into account.

Table S2: Summary of rigid body refinement by program CORAL.

|                     | Original position<br>(center of domain) |       |        | Refined position<br>(center of domain) |       |        | Mobility btw<br>domain<br>centers. (Å) | Rotation and translation matrix |           |           |          |            |          |           |          |             |           |          |          |
|---------------------|-----------------------------------------|-------|--------|----------------------------------------|-------|--------|----------------------------------------|---------------------------------|-----------|-----------|----------|------------|----------|-----------|----------|-------------|-----------|----------|----------|
|                     | x                                       | y     | z      | x                                      | y     | z      |                                        |                                 |           |           |          |            |          |           |          |             |           |          |          |
| BoNT/Ai<br>(pH=6.0) | 2.27                                    | 39.56 | 55.26  | -4.09                                  | 53.17 | 54.58  | 15.03                                  | 0.965261                        | 0.182831  | 0.186668  | -23.8271 | -0.261264  | 0.685324 | 0.679759  | -10.9193 | -0.00364706 | -0.704914 | 0.709283 | 43.2771  |
| BoNT/Ai<br>(pH=8.0) | 2.27                                    | 39.56 | 55.26  | -5.05                                  | 54.35 | 53.41  | 16.61                                  | 0.973669                        | 0.166944  | 0.155234  | -22.4419 | -0.227469  | 0.756365 | 0.613327  | -8.94977 | -0.015022   | -0.632489 | 0.774424 | 35.6654  |
| NTNHA-A<br>(pH=8.0) | -2.05                                   | -1.68 | -26.41 | -2.76                                  | -5.26 | -25.58 | 3.74                                   | 0.895671                        | -0.121028 | -0.427931 | -12.4249 | -0.120207  | 0.860551 | -0.494977 | -17.1319 | 0.428163    | 0.494777  | 0.756222 | -3.89463 |
| NTNHA-A<br>(pH=6.0) | -2.05                                   | -1.68 | -26.41 | -2.18                                  | -1.03 | -22.30 | 4.17                                   | 0.850463                        | -0.343842 | -0.398103 | -11.5323 | -0.0762804 | 0.668189 | -0.740071 | -19.6154 | 0.520475    | 0.65977   | 0.542041 | -5.80595 |
